# Supplementary material for: Real-time machine learning model to predict in-hospital cardiac arrest using heart rate variability in ICU
Source: Springer Nature journal article supplement (doi:10.1038/s41746-023-00960-2), 2023-11-23

**Supplementary Table 1. Discrimination performance of cardiac arrest in a clinical parameter-based model.**

|                    | AUROC             | AUPRC             | Sensitivity       | Specificity       | Precision         | Accuracy          | F1-score          |
|--------------------|-------------------|-------------------|-------------------|-------------------|-------------------|-------------------|-------------------|
| Primary outcome    |                   |                   |                   |                   |                   |                   |                   |
| Within             | 0.735             | 0.058             | 0.460             | 0.881             | 0.040             | 0.671             | 0.073             |
| 0.5-24h            | (0.720-<br>0.749) | (0.051-<br>0.065) | (0.434-<br>0.484) | (0.879-<br>0.883) | (0.037-<br>0.043) | (0.658-<br>0.683) | (0.068-<br>0.079) |
| Secondary outcomes |                   |                   |                   |                   |                   |                   |                   |
| Within             | 0.744             | 0.059             | 0.473             | 0.881             | 0.040             | 0.677             | 0.073             |
| 0.5-18h            | (0.729-<br>0.757) | (0.051-<br>0.066) | (0.447-<br>0.499) | (0.879-<br>0.883) | (0.037-<br>0.043) | (0.664-<br>0.690) | (0.068-<br>0.079) |
| Within             | 0.760             | 0.055             | 0.525             | 0.881             | 0.036             | 0.703             | 0.067             |
| 0.5-12h            | (0.743-<br>0.777) | (0.047-<br>0.062) | (0.495-<br>0.554) | (0.879-<br>0.883) | (0.033-<br>0.039) | (0.688-<br>0.718) | (0.062-<br>0.073) |
| Within             | 0.772             | 0.045             | 0.585             | 0.881             | 0.027             | 0.733             | 0.052             |
| 0.5-6h             | (0.753-<br>0.792) | (0.038-<br>0.053) | (0.550-<br>0.621) | (0.879-<br>0.883) | (0.025-<br>0.030) | (0.715-<br>0.751) | (0.048-<br>0.057) |
| Within             | 0.776             | 0.026             | 0.611             | 0.881             | 0.015             | 0.746             | 0.030             |
| 0.5-3h             | (0.749-<br>0.804) | (0.020-<br>0.033) | (0.560-<br>0.659) | (0.879-<br>0.883) | (0.014-<br>0.017) | (0.721-<br>0.770) | (0.026-<br>0.034) |
| Within             | 0.841             | 0.008             | 0.613             | 0.881             | 0.004             | 0.747             | 0.008             |
| 0.5-1h             | (0.795-<br>0.881) | (0.005-<br>0.012) | (0.515-<br>0.711) | (0.879-<br>0.883) | (0.003-<br>0.005) | (0.698-<br>0.796) | (0.006-<br>0.010) |

Data are presented as mean with 95% confidence interval. AUROC: area under the receiver operating characteristic curve; AUPRC: area under the precision-recall curve.



**Supplementary Figure 2. Changes in key heart rate variability (HRV) measures over time until the event (6 – 0.5 h).** Fluctuations in the top six important HRV measures before in-hospital cardiac arrest (6 – 0.5 h) are compared to their respective median values in patients without in-hospital cardiac arrest. The x and y axes represent time (min) and HRV measures values, respectively. The blue line and shaded region represent the mean value and 95% confidence intervals of HRV measures of each time before the event of in-hospital cardiac arrest, respectively, while the red dashed line represents the median value of HRV measures in patients without in-hospital cardiac arrest. Kendall's tau coefficient was used to measure the association between the time for the event (6 – 0.5 h) and HRV measures. HRV: heart rate variability; TINN: baseline width of the triangular interpolation of the RR interval histogram; HTI: heart rate variability triangular index; IALS: inverse of the average length of the acceleration/deceleration segments; Prc20NN: 20th percentile of the RR intervals; MinNN: minimum of the RR intervals; IQRNN: interquartile range of the RR intervals.

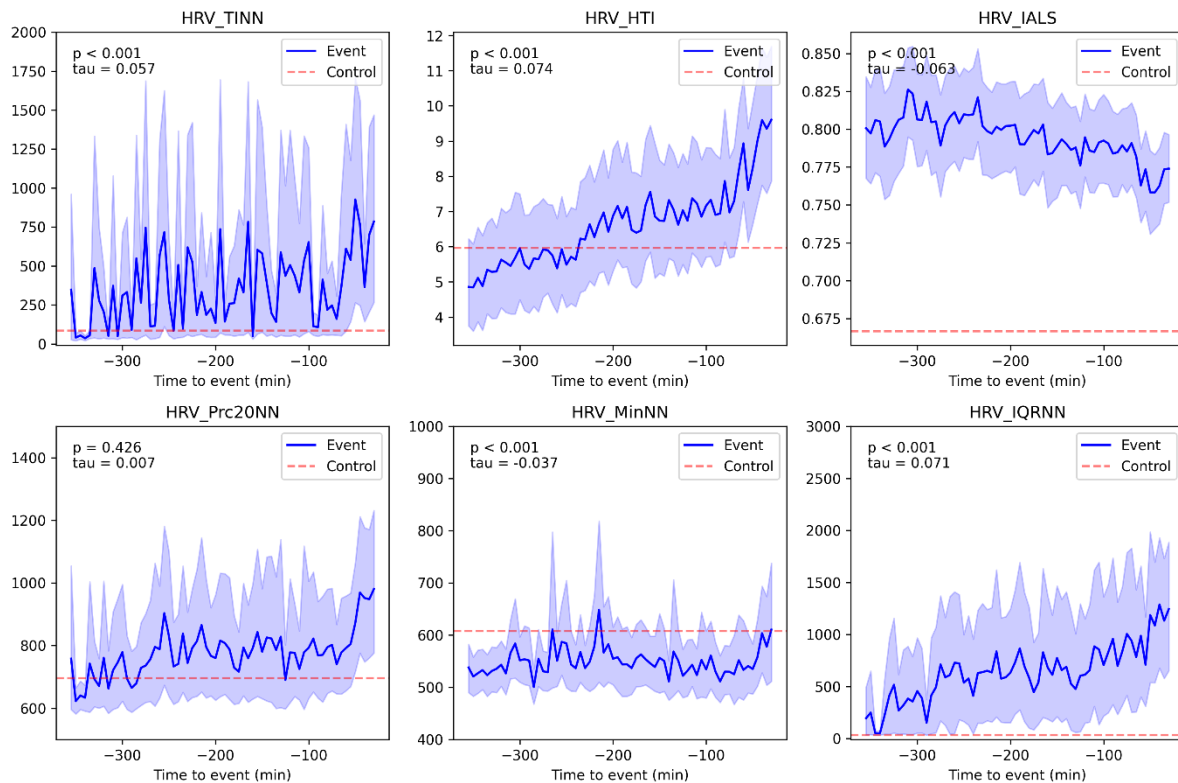

Supplement: MOESM1 [file 41746_2023_960_MOESM1_ESM.pdf]
